# Supplementary material
Source: Research Square preprint supplement (doi:10.21203/rs.3.rs-9473758/v1)
Supplement: Supplementary file 1 [file 1e077b256e9daf096a1098c9.docx]

Supplementary Table S2. Deterministic mapping of pre-IND features to normalized aiHumanoid treatment-level input concepts (−1 to +1 scale).

Animal efficacy: because all programs had positive animal efficacy by design, Tx_Treatment_Efficacy (base) was set to +0.1 for every program, reflecting a weak positive prior rather than strong evidence of human benefit.

Drug dosage and exposure:
Exposure_Achievable and achieved animal exposures relative to human-feasible ranges informed Tx_Drug_Dosage (e.g., exposures only achievable at supra-clinical doses produced more modest or neutral values).

Interaction potential:
Drug–drug interaction risk, polypharmacy context, and target class were combined into Tx_Drug_Interaction_Potential (more negative values indicating higher risk of problematic interactions).

Duration:
Approximate effective treatment duration in the pivotal non-clinical studies was normalized to Tx_Duration (short vs prolonged exposures) to penalize cases where only short-term animal data were available for diseases requiring chronic therapy.

Compliance:
Tx_Patient_Compliance captured expected adherence based on route of administration, dosing frequency, and known tolerability considerations.

Model confidence:
Categorical Animal_Model_Confidence was converted into Tx_Animal_model_confidence (e.g., High, Moderate, Low mapped to positive, neutral, and negative values, respectively).
