# Supplementary material
Source: Research Square preprint supplement (doi:10.21203/rs.3.rs-9473758/v1)
Supplement: Supplementary file 2 [file 8d5005aef0d421d9e867761f.docx]

Supplementary Table S3. Mechanistic adjustment parameters and transformation rules used to derive Tx_Treatment_Efficacy_effective from pre-IND biological and translational factors.

Genetics_Adjust:
Encoded strength and direction of human genetic support (Known_Human_Genetics), with strong causal human genetics contributing positive values and absent/weak or conflicting genetics contributing neutral or negative values.

Redundancy_Adjust:
Penalized high pathway redundancy (multiple bypass routes), and mildly favored low redundancy where target modulation is more likely to produce sustained human effects.

Compensatory_Adjust:
Penalized programs with extensive, well-characterized compensatory pathways capable of blunting target modulation in humans.

Complexity_Adjust:
Penalized high disease biological complexity (e.g., heterogeneous, network-dense, multi-system conditions) and mildly favored more biologically focused indications.

Rationale_Adjust:
Reflected the underlying reasoning used to advance the program from animals to humans: Mechanistic rationales contributed positive values, Efficacy-only rationales contributed negative values, with mixed or empirical rationales occupying intermediate positions.
