# Supplementary material
Source: Research Square preprint supplement (doi:10.21203/rs.3.rs-9473758/v1)
Supplement: Supplementary file 3 [file c345ce871f3dac20add53287.docx]

Supplementary Table S1. Definitions and categorical encoding of pre-IND therapeutic, biological, and animal model features used for aiHumanoid input mapping.

Therapeutic context: therapeutic area, indication, modality, and intended population.

Target and pathway context:

Primary_Target and Target_Class

Known_Human_Genetics: strength and nature of human genetic support for the target (e.g., strong causal, moderate association, weak/indirect, or absent).

Pathway_Redundancy: qualitative estimate of how many parallel or backup pathways can compensate for target inhibition (Low, Moderate, High).

Known_Compensatory_Pathways: presence and extent of known biological bypass mechanisms.

Disease_Biological_Complexity: overall complexity of the disease biology (Low, Moderate, High), considering heterogeneity, network density, and systemic involvement.

Animal model characteristics:

Species_Used (rodent only vs rodent + dog/NHP vs other combinations).

Disease_Model_Type (e.g., transgenic/knock-in/knock-out, xenograft, toxin-induced, infection models, etc.).

Animal_Efficacy_Signal: all programs in this analysis had a positive efficacy signal at pre-IND.

Animal_Toxicity_Signal: categorized as Acceptable vs Concerning based on observed findings and their perceived relevance to humans.

Exposure_Achievable: whether clinically relevant exposures were achieved in animals.

PK_Translation_Risk: Low, Moderate, or High risk that animal PK/ADME would not translate to humans.

Animal_Model_Confidence: overall qualitative confidence (High, Moderate, Low) in the disease model’s relevance to human pathophysiology.

Animal rationale and risk framing:

Animal_Rationale_Category: whether the decision to proceed was primarily Mechanistic (human biology and target/pathway logic), Efficacy-driven (magnitude/robustness of animal response), Mechanistic + Efficacy, or Empirical.

Animal_Go_NoGo: the original pre-IND decision (all Go in this curated dataset).

Animal_Key_Risk: primary risk concerns noted at the time (e.g., translational PK risk, disease complexity, compensatory biology).
